# Supplementary material
Source: publisher figshare collection journal article supplement (https://tandf.figshare.com/ndownloader/files/12809381)
Supplement: Supplementary file 1 [file 12809381]

## Supplementary Data

### **Mesoporous silica-coated gold nanostars with drug payload for combined chemo-photothermal cancer therapy**

Gaoxing Su<sup>a</sup>, Dandan Miao<sup>a</sup>, Yanyan Yu<sup>a</sup>, Min Zhou<sup>a</sup>, Peifu Jiao<sup>b</sup>, Xiaolong  
Cao<sup>a</sup>, Bing Yan<sup>c,\*</sup>, Hongyan Zhu<sup>a,\*</sup>

*<sup>a</sup>School of Pharmacy, Jiangsu Key Laboratory of Inflammation and Molecular Drug  
Targets, Nantong University, Nantong 226001, China*

*<sup>b</sup>Department of Chemistry, Qilu Normal University, Jinan250013, China*

*<sup>c</sup>School of Environmental Science and Engineering, Shandong University, Jinan 250100,  
China*

Corresponding author:

drbingyan@yahoo.com (Bing Yan);

amyntu@126.com (Hongyan Zhu)

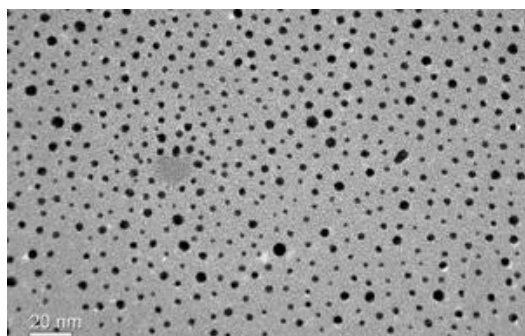

**Figure S1.** TEM images of gold seeds used in preparation of GNS.

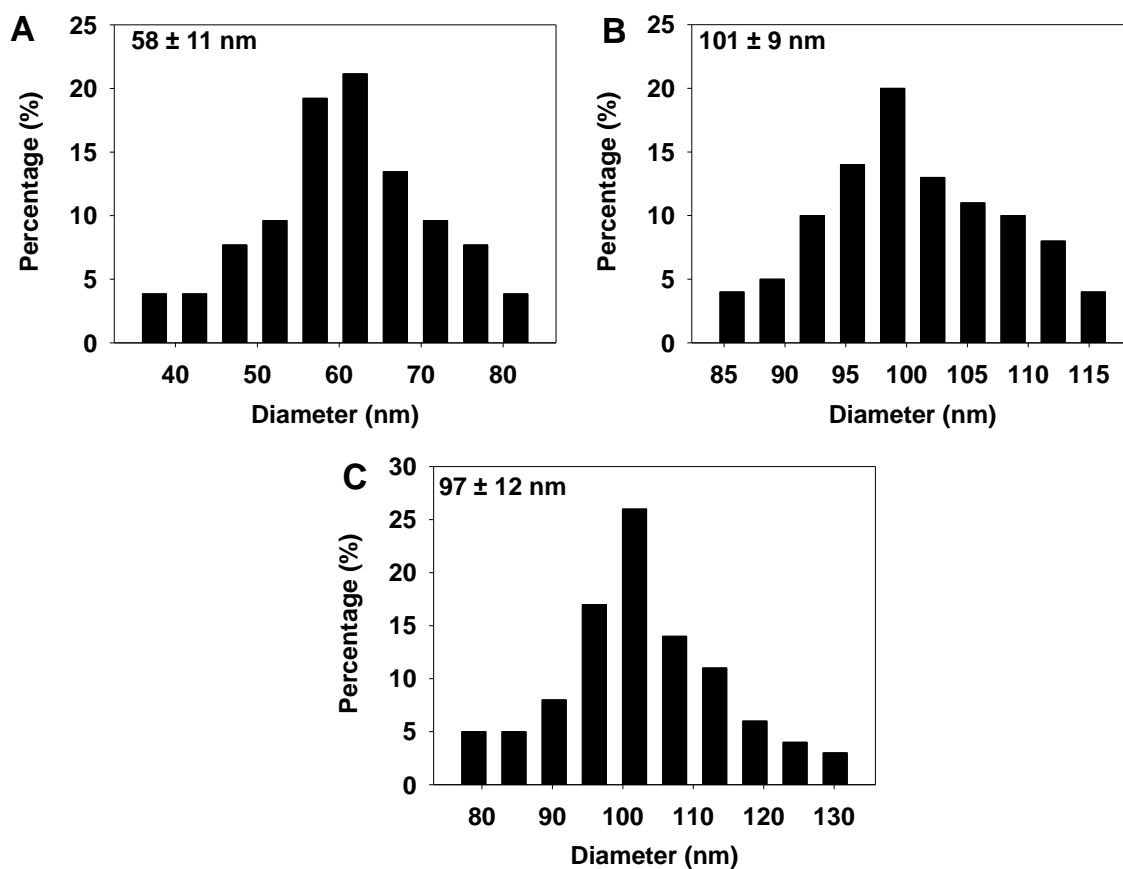

**Figure S2.** Size distributions of GNS (A), GNS@SiO<sub>2</sub> (B), and GNS@mSiO<sub>2</sub> (C) on the basis of their TEM images.

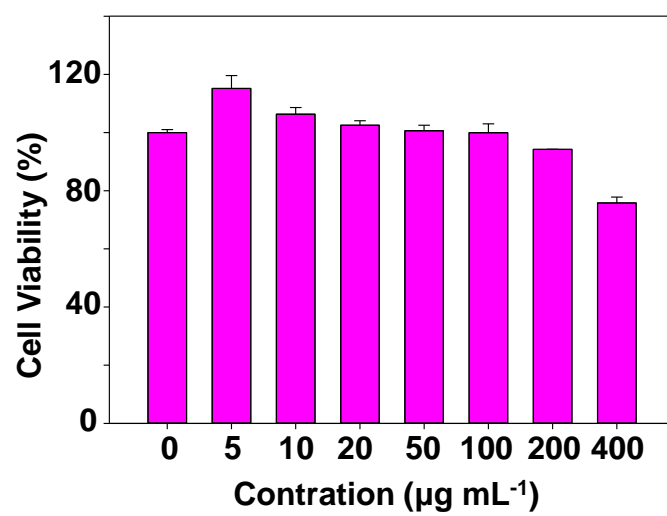

**Figure S3.** Cytotoxicity of GNS@mSiO<sub>2</sub>-PEG at different concentrations for 24 h.
